# Supplementary material for: Evaluating the quorum quenching potential of bacteria associated to Aurelia aurita and Mnemiopsis leidyi
Source: bioRxiv or medRxiv preprint supplement (doi:10.1101/602268), 2019-04-09
Supplement: Supplementary file [file media-1.pdf]

Supplement

**Evaluating the quorum quenching potential of bacteria associated to**

***Aurelia aurita* and *Mnemiopsis leidyi***

Daniela Prasse<sup>1\*</sup>, Nancy Weiland-Bräuer<sup>1\*</sup>, Cornelia Jaspers<sup>2</sup>, Thorsten B.H. Reusch<sup>2</sup>, and Ruth A. Schmitz<sup>1</sup>

<sup>1</sup>Institute of General Microbiology, Christian-Albrechts University Kiel, Am Botanischen Garten 1-9, 24118 Kiel, Germany

<sup>2</sup>GEOMAR Helmholtz Centre for Ocean Research Kiel, Marine Evolutionary Ecology, Kiel, Germany

\*Contributed equally to this work

## Supplement

**Tab. S1: Primers used for QQ-ORF amplification and sequence analysis.** Underlined parts are added restriction sites for directed cloning.

| <b>Primer</b>    | <b>Sequence 5' → 3'</b>                      |
|------------------|----------------------------------------------|
| 91_5/E6_ORF1_for | <u>GAATTC</u> CATGAACTTTACAGACAAATCAATTAAGGC |
| 91_5/E6_ORF1_rev | TCTAGATTACAATACTAAGCTTACTTTATGGC             |
| 91_5/E6_ORF2_for | <u>GAATTC</u> CATGCGTGGTACCCTAAACATTGC       |
| 91_5/E6_ORF2_rev | AAGCTTTTACAGACCTCCCTTGAGATACCGC              |
| 91_5/E6_ORF3_for | <u>GAATTC</u> CATGAGCAACAATAAAGACACAGTGC     |
| 91_5/E6_ORF3_rev | AAGCTTTTAATGAGCAACAATAAAGACACAG              |

## Supplement

**Tab. S2: Bacteria isolated from *Aurelia aurita*, *Mnemiopsis leidyi* and ambient seawater.** Bacteria were isolated by classical enrichment on agar plates and taxonomically classified based on full length 16S rRNA gene sequences. QQ activities of isolates are stated in (-) no activity, (+) low, (++) mid, and (+++) high activity against acyl-homoserine lactone (AHL) and autoinducer-2 (AI-2).

| Isolate | origin                                | best homologue based on 16S full length rRNA gene (Accession No., identity) | taxonomic classification |                     |                 |                  | colony morphology               | QQ activity |      |
|---------|---------------------------------------|-----------------------------------------------------------------------------|--------------------------|---------------------|-----------------|------------------|---------------------------------|-------------|------|
|         |                                       |                                                                             | phylum                   | class               | order           | family           |                                 | AHL         | AI-2 |
| 1       | <i>A. aurita</i> medusa<br>Baltic Sea | <i>Pseudomonas stutzeri</i><br>(JX177727.1, 99%)                            | Proteobacteria           | Gammaproteobacteria | Pseudomonadales | Pseudomonadaceae | yellowish-white, smeary         | -           | -    |
| 2       | <i>A. aurita</i> medusa<br>Baltic Sea | <i>Pseudomonas stutzeri</i><br>(JN228326.1, 99%)                            | Proteobacteria           | Gammaproteobacteria | Pseudomonadales | Pseudomonadaceae | orange, round                   | ++          | -    |
| 3       | <i>A. aurita</i> medusa<br>Baltic Sea | <i>Pseudomonas segetis</i><br>(AY770691.2, 99%)                             | Proteobacteria           | Gammaproteobacteria | Pseudomonadales | Pseudomonadaceae | white, round, smeary            | -           | -    |
| 4       | <i>A. aurita</i> medusa<br>Baltic Sea | <i>Pseudoalteromonas</i><br>sp. 191Z-13<br>(JX310231.1, 99%)                | Proteobacteria           | Gammaproteobacteria | Pseudomonadales | Pseudomonadaceae | white, smeary                   | +++         | -    |
| 5       | <i>A. aurita</i> medusa<br>Baltic Sea | Uncultured bacterium<br>clone ncd1928c11c1<br>(JF165581.1, 93%)             | n.a.                     | n.a.                | n.a.            | n.a.             | white with orange spots, smeary | +++         | -    |
| 6       | <i>A. aurita</i> medusa<br>Baltic Sea | <i>Vibrio alginolyticus</i><br>(KP698605.1, 99%)                            | Proteobacteria           | Gammaproteobacteria | Vibrionales     | Vibrionaceae     | white with orange spots, smeary | -           | -    |
| 7       | <i>A. aurita</i> medusa<br>Baltic Sea | <i>Vibrio</i> sp. S54CA<br>(KF188533.1, 98%)                                | Proteobacteria           | Gammaproteobacteria | Vibrionales     | Vibrionaceae     | white, smeary                   | -           | -    |
| 8       | <i>A. aurita</i> medusa<br>Baltic Sea | <i>Pseudomonas stutzeri</i><br>(JN228326.1, 99%)                            | Proteobacteria           | Gammaproteobacteria | Pseudomonadales | Pseudomonadaceae | yellow, round                   | ++          | -    |
| 9       | <i>A. aurita</i> medusa<br>Baltic Sea | <i>Pseudomonas stutzeri</i><br>(JX177727.1, 99%)                            | Proteobacteria           | Gammaproteobacteria | Pseudomonadales | Pseudomonadaceae | yellow, roundish                | +           | -    |
| 10      | <i>A. aurita</i> medusa<br>Baltic Sea | <i>Pseudomonas</i> sp.<br>BJGMM-B54<br>(JQ716254.1, 99%)                    | Proteobacteria           | Gammaproteobacteria | Pseudomonadales | Pseudomonadaceae | yellow, roundish                | ++          | -    |
| 11      | <i>A. aurita</i> medusa<br>Baltic Sea | <i>Pseudomonas stutzeri</i><br>(JX177727.1, 99%)                            | Proteobacteria           | Gammaproteobacteria | Pseudomonadales | Pseudomonadaceae | yellow, roundish                | ++          | -    |
| 12      | <i>A. aurita</i> medusa<br>Baltic Sea | <i>Alteromonas genoviensis</i><br>(FJ040187.1, 99%)                         | Proteobacteria           | Gammaproteobacteria | Alteromonadales | Alteromonadaceae | light yellow, round             | ++          | -    |

## Supplement

|    |                                                       |                                                                 |                |                     |                  |                   |                                  |     |   |
|----|-------------------------------------------------------|-----------------------------------------------------------------|----------------|---------------------|------------------|-------------------|----------------------------------|-----|---|
| 13 | <i>A. aurita</i><br>medusa<br>Baltic Sea              | <i>Bacillus subtilis</i><br>(JX188065.1, 98%)                   | Firmicutes     | Bacilli             | Bacillales       | Bacillaceae       | white, oval                      | -   | - |
| 14 | <i>A. aurita</i><br>medusa<br>Baltic Sea              | <i>Microbacterium lacticum</i> strain 2833<br>(EU714346.1, 99%) | Actinobacteria | Actinobacteria      | Actinomycetales  | Microbacteriaceae | white, smeary                    | -   | - |
| 15 | <i>A. aurita</i><br>medusa<br>Baltic Sea              | <i>Sulfitobacter</i> sp.<br>QD214-NF102<br>(KC689801.1, 99%)    | Proteobacteria | Alphaproteobacteria | Rhodobacterales  | Rhodobacteraceae  | light orange in<br>centre, round | +++ | + |
| 16 | <i>A. aurita</i><br>medusa<br>Baltic Sea              | <i>Micrococcus</i> sp. 3455<br>(KP345948.1, 99%)                | Actinobacteria | Actinobacteria      | Actinomycetales  | Micrococcaceae    | white, round                     | -   | - |
| 17 | <i>A. aurita</i><br>medusa<br>Baltic Sea              | <i>Bacillus cereus</i><br>(KF624695.1, 98%)                     | Firmicutes     | Bacilli             | Bacillales       | Bacillaceae       | white, roundish                  | -   | - |
| 18 | <i>A. aurita</i><br>medusa<br>Baltic Sea<br>husbandry | <i>Staphylococcus aureus</i><br>(CP011528.1, 99%)               | Firmicutes     | Bacilli             | Bacillales       | Staphylococcaceae | yellow, roundish-<br>smeary      | ++  | + |
| 19 | <i>A. aurita</i><br>medusa<br>Baltic Sea<br>husbandry | <i>Bacillus cereus</i><br>(DQ339684.1, 99%)                     | Firmicutes     | Bacilli             | Bacillales       | Bacillaceae       | white, smeary                    | -   | - |
| 20 | <i>A. aurita</i><br>medusa<br>Baltic Sea<br>husbandry | <i>Phaeobacter gallaeciensis</i><br>(NR_027609.1, 82%)          | Proteobacteria | Alphaproteobacteria | Rhodobacterales  | Rhodobacteraceae  | white, smeary                    | +   | - |
| 21 | <i>A. aurita</i><br>medusa<br>Baltic Sea<br>husbandry | <i>Cobetia amphilecti</i><br>(NR_113404.1, 99%)                 | Proteobacteria | Gammaproteobacteria | Halomonadaceae   | Cobetia           | white-orange,<br>smeary          | +   | - |
| 22 | <i>A. aurita</i><br>medusa<br>Baltic Sea<br>husbandry | <i>Pseudolateromonas</i><br>sp. MACLO7<br>(EF198247.1, 99%)     | Bacteroidetes  | Flavobacteriia      | Flavobacteriales | Flavobacteriaceae | orange, round                    | ++  | - |
| 23 | <i>A. aurita</i><br>medusa<br>Baltic Sea<br>husbandry | <i>Sulfitobacter</i> sp. S7-80<br>(KU999998.1, 99%)             | Proteobacteria | Alphaproteobacteria | Rhodobacterales  | Rhodobacteraceae  | white, round                     | ++  | - |
| 24 | <i>A. aurita</i><br>medusa<br>Baltic Sea<br>husbandry | <i>Pseudoalteromonas</i><br>sp. MACLO7<br>(EF198247.1, 99%)     | Proteobacteria | Gammaproteobacteria | Pseudomonadales  | Pseudomonadaceae  | light orange, round              | +   | - |
| 25 | <i>A. aurita</i><br>medusa<br>Baltic Sea<br>husbandry | <i>Pseudoalteromonas issachenkonii</i><br>(JQ799065.1, 99%)     | Proteobacteria | Gammaproteobacteria | Pseudomonadales  | Pseudomonadaceae  | white, round                     | ++  | - |
| 73 | <i>A. aurita</i><br>polyp                             | <i>Enterococcus casseliflavus</i>                               | Firmicutes     | Bacilli             | Lactobacillales  | Enterococcaceae   | white, roundish-<br>smeary       | +   | - |

## Supplement

|    |                                                |                                                                 |                |                     |                  |                   |                        |     |    |
|----|------------------------------------------------|-----------------------------------------------------------------|----------------|---------------------|------------------|-------------------|------------------------|-----|----|
|    | Baltic Sea husbandry                           | (KJ571214.1, 99%)                                               |                |                     |                  |                   |                        |     |    |
| 74 | <i>A. aurita</i> polyp<br>Baltic Sea husbandry | <i>Micrococcus</i> sp. 3723<br>(KP345967.1, 99%)                | Actinobacteria | Actinobacteria      | Actinomycetales  | Micrococcaceae    | light yellow, round    | -   | -  |
| 75 | <i>A. aurita</i> polyp<br>Baltic Sea husbandry | <i>Arthrobacter davidanieli</i><br>(AF099202.1, 99%)            | Actinobacteria | Actinobacteria      | Actinomycetales  | Micrococcaceae    | white, round           | -   | -  |
| 76 | <i>A. aurita</i> polyp<br>Baltic Sea husbandry | <i>Bacillus mycoides</i><br>(CP009692.1, 98%)                   | Firmicutes     | Bacilli             | Bacillales       | Bacillaceae       | white, irregular       | -   | -  |
| 77 | <i>A. aurita</i> polyp<br>Baltic Sea husbandry | <i>Vibrio ordalii</i><br>(KC884626.1, 99%)                      | Proteobacteria | Gammaproteobacteria | Vibrionales      | Vibrionaceae      | white-brownish, smeary | ++  | -  |
| 78 | <i>A. aurita</i> polyp<br>Baltic Sea husbandry | <i>Sulfitobacter</i> sp.<br>DG885<br>(AY258079.1, 99%)          | Proteobacteria | Alphaproteobacteria | Rhodobacterales  | Rhodobacteraceae  | white, smeary          | ++  | -  |
| 79 | <i>A. aurita</i> polyp<br>Baltic Sea husbandry | <i>Olleya marilimosa</i><br>strain KMM6714<br>(KC247324.1, 99%) | Bacteroidetes  | Flavobacteriia      | Flavobacteriales | Flavobacteriaceae | orange, round          | +++ | +  |
| 80 | <i>A. aurita</i> polyp<br>Baltic Sea husbandry | <i>Vibrio anguillarum</i><br>(JX966409.1, 99%)                  | Proteobacteria | Gammaproteobacteria | Vibrionales      | Vibrionaceae      | white-brown, smeary    | +++ | -  |
| 81 | <i>A. aurita</i> polyp<br>Baltic Sea husbandry | <i>Vibrio anguillarum</i><br>(JX966409.1, 99%)                  | Proteobacteria | Gammaproteobacteria | Vibrionales      | Vibrionaceae      | yellow, round          | +++ | ++ |
| 82 | <i>A. aurita</i> polyp<br>Baltic Sea husbandry | <i>Arthrobacter</i> sp.<br>MB182<br>(JF706644.1, 99%)           | Actinobacteria | Actinobacteria      | Actinomycetales  | Micrococcaceae    | white, round           | +   | -  |
| 83 | <i>A. aurita</i> polyp<br>Baltic Sea husbandry | <i>Gordonia terrae</i><br>(KM113032.1, 97%)                     | Actinobacteria | Actinobacteria      | Actinomycetales  | Nocardiaceae      | light orange, round    | -   | -  |
| 84 | <i>A. aurita</i> polyp<br>Baltic Sea husbandry | <i>Arthrobacter</i> sp.<br>MB182<br>(JF706644.1, 100%)          | Actinobacteria | Actinobacteria      | Actinomycetales  | Micrococcaceae    | white, round (tiny)    | ++  | -  |
| 85 | <i>A. aurita</i> polyp<br>Baltic Sea husbandry | <i>Staphylococcus warneri</i><br>(LC035464.1, 99%)              | Firmicutes     | Bacilli             | Bacillales       | Staphylococcaceae | white-yellow, round    | +   | -  |

## Supplement

|    |                                             |                                                          |                |                     |                 |                   |                        |     |    |
|----|---------------------------------------------|----------------------------------------------------------|----------------|---------------------|-----------------|-------------------|------------------------|-----|----|
| 86 | <i>A. aurita</i> polyp Baltic Sea husbandry | Alpha proteobacterium C45 (AB302365.1, 96%)              | Proteobacteria | Alphaproteobacteria | n.a.            | n.a.              | white, smeary          | -   | -  |
| 87 | <i>A. aurita</i> polyp Baltic Sea husbandry | <i>Staphylococcus</i> sp. C34 (JX482523.1, 99%)          | Firmicutes     | Bacilli             | Bacillales      | Staphylococcaceae | brownish, round        | +   | +  |
| 88 | <i>A. aurita</i> polyp Baltic Sea husbandry | <i>Paracoccus</i> sp. UBF-P7 (JX239761.1, 99%)           | Proteobacteria | Alphaproteobacteria | Rhodobacterales | Rhodobacteraceae  | white, smeary          | -   | -  |
| 89 | <i>A. aurita</i> polyp Baltic Sea husbandry | Alpha proteobacterium C45 (AB302365.1, 99%)              | Proteobacteria | Alphaproteobacteria | n.a.            | n.a.              | white, round           | -   | -  |
| 90 | <i>A. aurita</i> polyp Baltic Sea husbandry | <i>Pseudomonas putida</i> (FJ577648.1, 96%)              | Proteobacteria | Gammaproteobacteria | Pseudomonadales | Pseudomonadaceae  | white-yellow, round    | ++  | ++ |
| 91 | <i>A. aurita</i> polyp Baltic Sea husbandry | <i>Pseudoalteromonas issachenkonii</i> (JQ799065.1, 98%) | Proteobacteria | Gammaproteobacteria | Pseudomonadales | Pseudomonadaceae  | white-brownish, smeary | +++ | +  |
| 92 | <i>A. aurita</i> polyp Baltic Sea husbandry | <i>Pseudomonas putida</i> (GU191929.1, 99%)              | Proteobacteria | Gammaproteobacteria | Pseudomonadales | Pseudomonadaceae  | white, round           | ++  | -  |
| 93 | <i>A. aurita</i> polyp Baltic Sea husbandry | <i>Pseudomonas</i> sp. GA87 (AB934380.1, 99%)            | Proteobacteria | Gammaproteobacteria | Pseudomonadales | Pseudomonadaceae  | white, round with dent | ++  | -  |
| 94 | <i>A. aurita</i> polyp Baltic Sea husbandry | <i>Pseudomonas monteilli</i> (KP056325.1, 99%)           | Proteobacteria | Gammaproteobacteria | Pseudomonadales | Pseudomonadaceae  | orange, roundish       | ++  | -  |
| 95 | <i>A. aurita</i> polyp North Sea husbandry  | <i>Streptococcus infantis</i> (GU561389.1, 98%)          | Firmicutes     | Bacilli             | Lactobacillales | Streptococcaceae  | white, round           | -   | -  |
| 96 | <i>A. aurita</i> polyp North Sea husbandry  | <i>Enterococcus casseliflavus</i> (KJ571214.1, 99%)      | Firmicutes     | Bacilli             | Lactobacillales | Enterococcaceae   | white, round           | +   | -  |
| 97 | <i>A. aurita</i> polyp North Sea husbandry  | <i>Shewanella</i> sp. W3-18-1 (CP000503.1, 99%)          | Proteobacteria | Betaproteobacteria  | Alteromonadales | Oxalobacteraceae  | yellowish, smeary      | +   | +  |

## Supplement

|     |                                            |                                                           |                |                     |                  |                      |                                         |     |   |
|-----|--------------------------------------------|-----------------------------------------------------------|----------------|---------------------|------------------|----------------------|-----------------------------------------|-----|---|
| 98  | <i>A. aurita</i> polyp North Sea husbandry | <i>Olleya marilimosa</i> strain KMM6714 (KC247324.1, 99%) | Bacteroidetes  | Flavobacteriia      | Flavobacteriales | Flavobacteriaceae    | yellow/orange, smeary                   | -   | - |
| 99  | <i>A. aurita</i> polyp North Sea husbandry | <i>Pseudoalteromonas issachenkonii</i> (JQ799065.1, 99%)  | Proteobacteria | Gammaproteobacteria | Pseudomonadales  | Pseudomonadaceae     | light orange, round                     | ++  | + |
| 100 | <i>A. aurita</i> polyp North Sea husbandry | <i>Sulfitobacter</i> sp. DG885 (AY258079.1, 99%)          | Proteobacteria | Alphaproteobacteria | Rhodobacterales  | Rhodobacteraceae     | white-yellow, smeary                    | +++ | - |
| 101 | <i>A. aurita</i> polyp North Sea husbandry | <i>Pseudoalteromonas issachenkonii</i> (JQ799065.1, 99%)  | Proteobacteria | Gammaproteobacteria | Pseudomonadales  | Pseudomonadaceae     | very light orange, smeary               | -   | - |
| 102 | <i>A. aurita</i> polyp North Sea husbandry | <i>Alteromonas</i> sp. SN2 (KJ781946.1, 99%)              | Proteobacteria | Gammaproteobacteria | Alteromonadales  | Alteromonadaceae     | white, brownish in center, round-smeary | +   | - |
| 103 | <i>A. aurita</i> polyp North Sea husbandry | <i>Pseudoalteromonas ruthenica</i> (NR_025140.1, 98-99%)  | Proteobacteria | Gammaproteobacteria | Pseudomonadales  | Pseudomonadaceae     | brownish, smeary                        | +++ | - |
| 104 | <i>A. aurita</i> polyp North Sea husbandry | <i>Ruegeria mobilis</i> (HQ338148.1, 99%)                 | Proteobacteria | Alphaproteobacteria | Rhodobacterales  | Rhodobacteraceae     | light, orange, smeary                   | ++  | - |
| 105 | <i>A. aurita</i> polyp North Sea husbandry | <i>Shewanella basaltis</i> (KC534403.1, 99%)              | Proteobacteria | Betaproteobacteria  | Alteromonadales  | Oxalobacteraceae     | white-yellow, smeary                    | -   | - |
| 106 | <i>A. aurita</i> polyp North Sea husbandry | <i>Hymenobacter psychrophilus</i> (NR_117214.1, 98%)      | Bacteroidetes  | Cytophagia          | Cytophagales     | Hymenobacteraceae    | orange-pink, round                      | -   | - |
| 107 | <i>A. aurita</i> polyp North Sea husbandry | <i>Luteococcus japonicas</i> (NR_119351.1, 99%)           | Actinobacteria | Actinobacteria      | Actinomycetales  | Propionibacteriaceae | orange, round, smeary                   | +   | - |
| 108 | <i>A. aurita</i> polyp North Sea husbandry | <i>Chryseobacterium hominis</i> (JX100820.1, 98-99%)      | Bacteroidetes  | Flavobacteriia      | Flavobacteriales | Flavobacteriaceae    | white, round                            | +   | - |
| 109 | <i>A. aurita</i> polyp North Sea husbandry | <i>Rhodococcus erythropolis</i> PR4 (CP011295.1, 100%)    | Actinobacteria | Actinobacteria      | Actinomycetales  | Nocardiaceae         | white, roundish-smeary                  | -   | - |

## Supplement

|     |                                                          |                                                             |                |                     |                  |                   |                          |     |   |
|-----|----------------------------------------------------------|-------------------------------------------------------------|----------------|---------------------|------------------|-------------------|--------------------------|-----|---|
| 110 | <i>A. aurita</i><br>polyp<br>North Sea<br>husbandry      | <i>Enterococcus casseliflavus</i><br>(KJ571214.1, 98-99%)   | Firmicutes     | Bacilli             | Lactobacillales  | Enterococcaceae   | translucent,<br>smeary   | -   | - |
| 111 | <i>A. aurita</i><br>polyp<br>North Sea<br>husbandry      | <i>Brevibacterium frigiditolerans</i><br>(JF411310.1, 99%)  | Actinobacteria | Actinobacteria      | Actinomycetales  | Brevibacteriaceae | white, round             | +++ | - |
| 112 | <i>A. aurita</i><br>polyp<br>North Sea<br>husbandry      | <i>Rhodococcus sp.</i><br>B126<br>(KJ781946.1, 99%)         | Actinobacteria | Actinobacteria      | Actinomycetales  | Nocardiaceae      | white, smeary            | ++  | + |
| 113 | <i>A. aurita</i><br>polyp<br>North Sea<br>husbandry      | <i>Sulfitobacter sp.</i> 13Z-<br>6<br>(JX310150.1, 99%)     | Proteobacteria | Alphaproteobacteria | Rhodobacterales  | Rhodobacteraceae  | white, smeary            | -   | - |
| 114 | <i>A. aurita</i><br>polyp North<br>Atlantic<br>husbandry | <i>Pseudomonas stutzeri</i><br>(HM137032.1, 99%)            | Proteobacteria | Gammaproteobacteria | Pseudomonadales  | Pseudomonadaceae  | white-yellow, round      | ++  | - |
| 115 | <i>A. aurita</i><br>polyp North<br>Atlantic<br>husbandry | <i>Moraxella osloensis</i><br>(AB643593.1, 99%)             | Proteobacteria | Gammaproteobacteria | Halobacteriales  | Moraxellaceae     | white, round             | -   | - |
| 116 | <i>A. aurita</i><br>polyp North<br>Atlantic<br>husbandry | <i>Enterococcus casseliflavus</i><br>(KJ571214.1, 99%)      | Firmicutes     | Bacilli             | Lactobacillales  | Enterococcaceae   | white, round             | -   | - |
| 117 | <i>A. aurita</i><br>polyp North<br>Atlantic<br>husbandry | <i>Ruegeria mobilis</i><br>(HQ338132.1, 99%)                | Proteobacteria | Alphaproteobacteria | Rhodobacterales  | Rhodobacteraceae  | pink, smeary             | +++ | - |
| 118 | <i>A. aurita</i><br>polyp North<br>Atlantic<br>husbandry | <i>Micrococcus sp.</i> 3723<br>(KP345967.1, 96%)            | Actinobacteria | Actinobacteria      | Actinomycetales  | Micrococcaceae    | white, round             | -   | - |
| 119 | <i>A. aurita</i><br>polyp North<br>Atlantic<br>husbandry | <i>Pseudoalteromonas issachenkonii</i><br>(JQ799065.1, 99%) | Proteobacteria | Gammaproteobacteria | Pseudomonadales  | Pseudomonadaceae  | light orange, round      | ++  | - |
| 120 | <i>A. aurita</i><br>polyp North<br>Atlantic<br>husbandry | <i>Pseudoalteromonas sp.</i> MACLO7<br>(EF198247.1, 99%)    | Proteobacteria | Gammaproteobacteria | Pseudomonadales  | Pseudomonadaceae  | white-brownish,<br>round | ++  | - |
| 121 | <i>A. aurita</i><br>polyp North<br>Atlantic<br>husbandry | <i>Olleya sp.</i> MOLA 14<br>(AM990790.1, 99%)              | Bacteroidetes  | Flavobacteriia      | Flavobacteriales | Flavobacteriaceae | light orange, round      | ++  | - |
| 122 | <i>A. aurita</i><br>polyp North                          | <i>Glaciecola sp.</i> KMM<br>6755                           | Proteobacteria | Gammaproteobacteria | Alteromonadales  | Alteromonadaceae  | white, smeary            | -   | - |



## Supplement

|     |                                                 |                                                                       |                |                     |                  |                      |                             |     |   |
|-----|-------------------------------------------------|-----------------------------------------------------------------------|----------------|---------------------|------------------|----------------------|-----------------------------|-----|---|
|     | Atlantic husbandry                              | (KF273912.1, 99%)                                                     |                |                     |                  |                      |                             |     |   |
| 123 | <i>A. aurita</i> polyp North Atlantic husbandry | <i>Luteococcus japonicus</i> (NR_119351.1, 99%)                       | Actinobacteria | Actinobacteria      | Actinomycetales  | Propionibacteriaceae | white, round                | +   | - |
| 124 | <i>A. aurita</i> polyp North Atlantic husbandry | <i>Staphylococcus epidermidis</i> (FJ030635.1, 97%)                   | Firmicutes     | Bacilli             | Bacillales       | Staphylococcaceae    | white, smeary               | -   | - |
| 125 | <i>A. aurita</i> polyp North Atlantic husbandry | <i>Sulfitobacter</i> sp. DG885 (AY258079.1, 99%)                      | Proteobacteria | Alphaproteobacteria | Rhodobacterales  | Rhodobacteraceae     | white, round                | -   | - |
| 126 | <i>A. aurita</i> polyp North Atlantic husbandry | <i>Sulfitobacter</i> sp. QD214-NF102 (KC689801.1, 99%)                | Proteobacteria | Alphaproteobacteria | Rhodobacterales  | Rhodobacteraceae     | white-orange, round         | +++ | - |
| 127 | <i>A. aurita</i> polyp North Atlantic husbandry | <i>Staphylococcus succinus</i> subsp. <i>casei</i> (NR_037053.1, 99%) | Firmicutes     | Bacilli             | Bacillales       | Staphylococcaceae    | orange, roundish            | +++ | - |
| 128 | <i>A. aurita</i> polyp North Atlantic husbandry | <i>Rhodococcus</i> sp. B126 (KJ781946.1, 98%)                         | Actinobacteria | Actinobacteria      | Actinomycetales  | Nocardiaceae         | white, orange, round-smeary | +++ | - |
| 129 | <i>A. aurita</i> polyp North Atlantic husbandry | <i>Staphylococcus aureus</i> (CP011528.1, 99%)                        | Firmicutes     | Bacilli             | Bacillales       | Staphylococcaceae    | white-yellow, roundish      | -   | - |
| 130 | <i>A. aurita</i> polyp North Atlantic husbandry | <i>Pseudomonas pachastrellae</i> (EU603457.1, 99%)                    | Proteobacteria | Gammaproteobacteria | Pseudomonadales  | Pseudomonadaceae     | white, roundish             | +   | - |
| 131 | <i>A. aurita</i> polyp North Atlantic husbandry | <i>Rhodococcus</i> sp. FXJ8.222 (KM507704.1, 99%)                     | Actinobacteria | Actinobacteria      | Actinomycetales  | Nocardiaceae         | translucent, round          | +++ | - |
| 51  | <i>M. leidyi</i> Baltic Sea                     | Uncultured bacterium clone nck64c11c1 (KF072560.1, 92%)               | n.a.           | n.a.                | n.a.             | n.a.                 | yellow, roundish, smeary    | -   | - |
| 52  | <i>M. leidyi</i> Baltic Sea                     | <i>Micrococcus endophyticus</i> (JQ659309.1, 99%)                     | Actinobacteria | Actinobacteria      | Actinomycetales  | Micrococcaceae       | light yellow, round         | -   | - |
| 53  | <i>M. leidyi</i> Baltic Sea                     | <i>Alteromonas</i> sp. 2c3 (AJ294361.1, 99%)                          | Proteobacteria | Gammaproteobacteria | Alteromonadales  | Alteromonadaceae     | white, roundish-smeary      | ++  | - |
| 54  | <i>M. leidyi</i> Baltic Sea                     | <i>Lacinutrix</i> sp. JR-M6 (KJ461692.1, 99%)                         | Bacteroidetes  | Flavobacteriia      | Flavobacteriales | Flavobacteriaceae    | white-orange, round         | ++  | - |

## Supplement

|     |                                |                                                                                   |                |                     |                   |                    |                                |     |   |
|-----|--------------------------------|-----------------------------------------------------------------------------------|----------------|---------------------|-------------------|--------------------|--------------------------------|-----|---|
| 55  | <i>M. leidyi</i><br>Baltic Sea | <i>Marinomonas hwangdonensis</i><br>(NR_109448.1, 98%)                            | Proteobacteria | Gammaproteobacteria | Oceanospirillales | Oceanospirillaceae | translucent, round             | +++ | - |
| 56  | <i>M. leidyi</i><br>Baltic Sea | <i>Colwellia</i><br>sp.BSs20120<br>(EU330346.1, 99%)                              | Proteobacteria | Gammaproteobacteria | Alteromonadales   | Colwelliaceae      | light orange, round            | -   | - |
| 57  | <i>M. leidyi</i><br>Baltic Sea | <i>Olleya marlimosa</i><br>strain KMM6714<br>(KC247324.1, 99%)                    | Bacteroidetes  | Flavobacteriia      | Flavobacteriales  | Flavobacteriaceae  | translucent, round             | +++ | + |
| 58  | <i>M. leidyi</i><br>Baltic Sea | <i>Rhodococcus</i> sp.<br>ZS342<br>(JX428878.1, 99%)                              | Actinobacteria | Actinobacteria      | Actinomycetales   | Nocardiaceae       | orange, roundish-smearly       | -   | - |
| 59  | <i>M. leidyi</i><br>Baltic Sea | <i>Microbacterium</i> sp.<br>CDR2P2B2<br>(KJ567128.1, 99%)                        | Actinobacteria | Actinobacteria      | Actinomycetales   | Microbacteriaceae  | white, round                   | -   | - |
| 60  | <i>M. leidyi</i><br>Baltic Sea | <i>Alteromonas</i> sp. 2c3<br>(AJ294361.1, 99%)                                   | Proteobacteria | Gammaproteobacteria | Alteromonadales   | Alteromonadaceae   | white, round, smearly          | ++  | - |
| 61  | <i>M. leidyi</i><br>Baltic Sea | <i>Phaeocystidibacter luteus</i><br>(HQ434766.1, 99%)                             | Bacteroidetes  | Flavobacteriia      | Flavobacteriales  | Cryomorphaceae     | dark orange, oval              | -   | - |
| 62  | <i>M. leidyi</i><br>Baltic Sea | <i>Sagittula</i> sp. BG-9-E2<br>(KF560336.1, 89%)                                 | Proteobacteria | Alphaproteobacteria | Rhodobacterales   | Rhodobacteraceae   | yellowish, oval                | -   | - |
| 63  | <i>M. leidyi</i><br>Baltic Sea | <i>Microbacterium oxydans</i><br>(KP136285.1, 99%)                                | Actinobacteria | Actinobacteria      | Actinomycetales   | Microbacteriaceae  | white, round                   | -   | - |
| 213 | <i>M. leidyi</i><br>Baltic Sea | <i>Vibrio</i> sp.<br>(MF975618.1, 98%)                                            | Proteobacteria | Gammaproteobacteria | Vibrionales       | Vibrionaceae       | yellowish, round               | +++ | + |
| 215 | <i>M. leidyi</i><br>Baltic Sea | <i>Pseudomonas</i> sp.<br>(KM461109.1, 99%)                                       | Proteobacteria | Gammaproteobacteria | Pseudomonadales   | Pseudomonadaceae   | white-yellow, round            | +   | - |
| 218 | <i>M. leidyi</i><br>Baltic Sea | <i>Pseudoclavibacter</i> sp.<br>(KY074321.1, 97%)                                 | Actinobacteria | Actinobacteria      | Actinomycetales   | Microbacteriaceae  | yellow, round                  | -   | - |
| 219 | <i>M. leidyi</i><br>Baltic Sea | <i>Pseudoalteromonas tunicata</i><br>(KY319053.1, 99%)                            | Proteobacteria | Gammaproteobacteria | Pseudomonadales   | Pseudomonadaceae   | violet, round                  | +++ | - |
| 221 | <i>M. leidyi</i><br>Baltic Sea | <i>Aeromonas salmonicida</i><br>(HG941669.1, 98%)                                 | Proteobacteria | Gammaproteobacteria | Aeromonadales     | Aeromonadaceae     | translucent, round             | ++  | - |
| 222 | <i>M. leidyi</i><br>Baltic Sea | <i>Marinomonas pontica</i><br>(NR_042965.1, 100%)                                 | Proteobacteria | Gammaproteobacteria | Oceanospirillales | Oceanospirillaceae | translucent, round             | +++ | - |
| 223 | <i>M. leidyi</i><br>Baltic Sea | Uncultured<br><i>Alteromonas</i> sp. clone<br>G9UC_PoM_0m_07<br>(KP076503.1, 98%) | Proteobacteria | Gammaproteobacteria | Alteromonadales   | Alteromonadaceae   | white with black center, round | -   | - |
| 224 | <i>M. leidyi</i><br>Baltic Sea | <i>Pseudoalteromonas</i><br>sp.<br>(KY671155.1, 97%)                              | Proteobacteria | Gammaproteobacteria | Pseudomonadales   | Pseudomonadaceae   | white, round                   | +++ | + |
| 225 | <i>M. leidyi</i><br>Baltic Sea | <i>Acinetobacter</i> sp.<br>(JX266367.1, 99%)                                     | Proteobacteria | Gammaproteobacteria | Halobacteriales   | Moraxellaceae      | white, spreading               | -   | - |

## Supplement

|     |                                |                                                                         |                |                     |                 |                   |                              |     |    |
|-----|--------------------------------|-------------------------------------------------------------------------|----------------|---------------------|-----------------|-------------------|------------------------------|-----|----|
| 228 | <i>M. leidyi</i><br>Baltic Sea | <i>Shewanella</i> sp.<br>(KX230028.1, 96%)                              | Proteobacteria | Betaproteobacteria  | Alteromonadales | Oxalobacteraceae  | yellow, round                | ++  | ++ |
| 229 | <i>M. leidyi</i><br>Baltic Sea | <i>Shewanella</i> sp.<br>(JQ867500.1, 99%)                              | Proteobacteria | Betaproteobacteria  | Alteromonadales | Oxalobacteraceae  | red, round                   | +++ | +  |
| 232 | <i>M. leidyi</i><br>Baltic Sea | <i>Pseudoalteromonas</i><br>sp.<br>(JQ406678.1, 99%)                    | Proteobacteria | Gammaproteobacteria | Pseudomonadales | Pseudomonadaceae  | orange, round                | +   | -  |
| 233 | <i>M. leidyi</i><br>Baltic Sea | <i>Shewanella</i> sp.<br>(KX531009.1, 99%)                              | Proteobacteria | Betaproteobacteria  | Alteromonadales | Oxalobacteraceae  | white, round                 | -   | -  |
| 234 | <i>M. leidyi</i><br>Baltic Sea | <i>Pseudoalteromonas</i><br>sp.<br>(EU935585.1, 99%)                    | Proteobacteria | Gammaproteobacteria | Pseudomonadales | Pseudomonadaceae  | black, round                 | +++ | -  |
| 235 | <i>M. leidyi</i><br>Baltic Sea | <i>Shewanella</i> sp.<br>(KX531009.1, 99%)                              | Proteobacteria | Betaproteobacteria  | Alteromonadales | Oxalobacteraceae  | yellow, round                | ++  | -  |
| 237 | <i>M. leidyi</i><br>Baltic Sea | <i>Shewanella</i> sp.<br>(JQ867500.1, 99%)                              | Proteobacteria | Betaproteobacteria  | Alteromonadales | Oxalobacteraceae  | red, round                   | -   | -  |
| 240 | <i>M. leidyi</i><br>Baltic Sea | <i>Pseudoalteromonas</i><br>sp.<br>(HQ882787.1, 99%)                    | Proteobacteria | Gammaproteobacteria | Pseudomonadales | Pseudomonadaceae  | yellow, round                | +++ | -  |
| 241 | <i>M. leidyi</i><br>Baltic Sea | <i>Pseudoalteromonas</i><br>sp.<br>(EU330361.1, 99%)                    | Proteobacteria | Gammaproteobacteria | Pseudomonadales | Pseudomonadaceae  | white, round                 | -   | -  |
| 242 | <i>M. leidyi</i><br>Baltic Sea | Uncultured bacterium<br>clone A3_91<br>(MF113934.1, 99%)                | n.a.           | n.a.                | n.a.            | n.a.              | translucent, round           | -   | -  |
| 243 | <i>M. leidyi</i><br>Baltic Sea | <i>Pseudoalteromonas</i><br><i>tunicata</i><br>(KY319053.1, 99%)        | Proteobacteria | Gammaproteobacteria | Pseudomonadales | Pseudomonadaceae  | black, round                 | +   | -  |
| 246 | <i>M. leidyi</i><br>Baltic Sea | <i>Pseudomonas</i> sp.<br>(HQ844525.1, 97%)                             | Proteobacteria | Gammaproteobacteria | Pseudomonadales | Pseudomonadaceae  | white-yellow,<br>spreading   | +++ | -  |
| 247 | <i>M. leidyi</i><br>Baltic Sea | <i>Shewanella</i> sp.<br>(JF825437.1, 98%)                              | Proteobacteria | Betaproteobacteria  | Alteromonadales | Oxalobacteraceae  | translucent-yellow,<br>round | +++ | -  |
| 248 | <i>M. leidyi</i><br>Baltic Sea | Uncultured bacterium<br>clone Woods-<br>Hole_a2237<br>(KF798527.1, 98%) | n.a.           | n.a.                | n.a.            | n.a.              | white-yellow, round          | -   | -  |
| 249 | <i>M. leidyi</i><br>Baltic Sea | <i>Pseudoalteromonas</i><br>sp.<br>(KT583320.1, 97%)                    | Proteobacteria | Gammaproteobacteria | Pseudomonadales | Pseudomonadaceae  | black, round                 | ++  | -  |
| 250 | <i>M. leidyi</i><br>Baltic Sea | <i>Pseudoalteromonas</i><br>sp.<br>(FR821214.1, 99%)                    | Proteobacteria | Gammaproteobacteria | Pseudomonadales | Pseudomonadaceae  | violet, round                | +++ | -  |
| 251 | <i>M. leidyi</i><br>Baltic Sea | <i>Pseudoalteromonas</i><br><i>tunicata</i><br>(KY319053.1, 99%)        | Proteobacteria | Gammaproteobacteria | Pseudomonadales | Pseudomonadaceae  | white, round                 | -   | -  |
| 254 | <i>M. leidyi</i><br>Baltic Sea | <i>Shewanella</i> sp.<br>(KC247331.1, 99%)                              | Proteobacteria | Betaproteobacteria  | Alteromonadales | Oxalobacteraceae  | red, round                   | +++ | -  |
| 255 | <i>M. leidyi</i><br>Baltic Sea | <i>Pseudoclavibacter</i> sp.<br>(KM199858.1, 97%)                       | Actinobacteria | Actinobacteria      | Actinomycetales | Microbacteriaceae | light yellow, round          | -   | -  |

## Supplement

|     |                                          |                                                           |                |                     |                   |                    |                                |     |    |
|-----|------------------------------------------|-----------------------------------------------------------|----------------|---------------------|-------------------|--------------------|--------------------------------|-----|----|
| 256 | <i>M. leidyi</i><br>Baltic Sea           | <i>Pseudoalteromonas tunicata</i><br>(KY319053.1, 99%)    | Proteobacteria | Gammaproteobacteria | Pseudomonadales   | Pseudomonadaceae   | yellow, round                  | +   | -  |
| 260 | <i>M. leidyi</i><br>Baltic Sea           | <i>Shewanella sp.</i><br>(KX692892.1, 99%)                | Proteobacteria | Betaproteobacteria  | Alteromonadales   | Oxalobacteraceae   | white-red, round               | +++ | +  |
| 261 | <i>M. leidyi</i><br>Baltic Sea           | <i>Psychrobacter cryohalolentis</i><br>(KY405931.1, 98%)  | Proteobacteria | Gammaproteobacteria | Halobacteriales   | Moraxellaceae      | white, spreading               | -   | -  |
| 262 | <i>M. leidyi</i><br>Baltic Sea           | <i>Marinomonas pontica</i><br>(NR_042965.1, 98%)          | Proteobacteria | Gammaproteobacteria | Oceanospirillales | Oceanospirillaceae | translucent, round             | +++ | -  |
| 264 | <i>M. leidyi</i><br>Baltic Sea           | <i>Exiguobacterium acetylicum</i><br>(MG490164.1, 99%)    | Firmicutes     | Bacilli             | Bacillales        | Bacilli            | orange, round                  | -   | -  |
| 265 | <i>M. leidyi</i><br>Baltic Sea           | <i>Pseudomonas sp.</i><br>(KY907020.1, 98%)               | Proteobacteria | Gammaproteobacteria | Pseudomonadales   | Pseudomonadaceae   | yellow, round                  | +   | -  |
| 269 | <i>M. leidyi</i><br>Baltic Sea           | <i>Phaeobacter daeponensis</i><br>(NR_044026.1, 99%)      | Proteobacteria | Alphaproteobacteria | Rhodobacterales   | Rhodobacteraceae   | translucent-yellow, oval       | -   | -  |
| 270 | <i>M. leidyi</i><br>Baltic Sea           | <i>Bacillus sp.</i><br>(KF746902.1, 97%)                  | Firmicutes     | Bacilli             | Bacillales        | Bacillaceae        | black, round                   | -   | -  |
| 65  | <i>M. leidyi</i><br>Baltic Sea husbandry | <i>Pseudoalteromonas atlantica</i><br>(KP645203.1, 99%)   | Proteobacteria | Gammaproteobacteria | Pseudomonadales   | Pseudomonadaceae   | white, smeary                  | +   | +  |
| 66  | <i>M. leidyi</i><br>Baltic Sea husbandry | <i>Alteromonas genoviensis</i><br>(FJ040187.1, 99%)       | Proteobacteria | Gammaproteobacteria | Alteromonadales   | Alteromonadaceae   | white, round                   | ++  | -  |
| 67  | <i>M. leidyi</i><br>Baltic Sea husbandry | <i>Shewanella sp.</i> KMM 6721<br>(KC247331.1, 99%)       | Proteobacteria | Betaproteobacteria  | Alteromonadales   | Oxalobacteraceae   | translucent, round             | +++ | ++ |
| 68  | <i>M. leidyi</i><br>Baltic Sea husbandry | <i>Vibrio sp.</i> VibC-Oc-066<br>(KF577069.1, 99%)        | Proteobacteria | Gammaproteobacteria | Vibrionales       | Vibrionaceae       | light orange, round            | +++ | +  |
| 69  | <i>M. leidyi</i><br>Baltic Sea husbandry | <i>Rhodobacter sp.</i> W402<br>(KF268394.1, 99%)          | Proteobacteria | Alphaproteobacteria | Rhodobacterales   | Rhodobacteraceae   | orange, round                  | -   | -  |
| 70  | <i>M. leidyi</i><br>Baltic Sea husbandry | <i>Vibrio sp.</i> VibC-Oc-066<br>(KF577069.1, 99%)        | Proteobacteria | Gammaproteobacteria | Vibrionales       | Vibrionaceae       | white, orange in center, round | ++  | -  |
| 71  | <i>M. leidyi</i><br>Baltic Sea husbandry | <i>Ochrobactrum sp.</i> P1(2013)<br>(KF987808.1, 99%)     | Proteobacteria | Alphaproteobacteria | Rhizobiales       | Brucellaceae       | white, round                   | -   | -  |
| 72  | <i>M. leidyi</i><br>Baltic Sea husbandry | <i>Microbacterium sp.</i> MN2-1<br>(JQ396523.1, 99%)      | Actinobacteria | Actinobacteria      | Actinomycetales   | Microbacteriaceae  | yellowish-white, round         | -   | -  |
| 217 | <i>M. leidyi</i><br>Baltic Sea husbandry | <i>Hydrogenophaga taeniospiralis</i><br>(AB795550.1, 99%) | Proteobacteria | Betaproteobacteria  | Burkholderiales   | Comamonadaceae     | translucent-red, round         | -   | -  |

## Supplement

|     |                                             |                                                                      |                |                     |                   |                   |                              |     |   |
|-----|---------------------------------------------|----------------------------------------------------------------------|----------------|---------------------|-------------------|-------------------|------------------------------|-----|---|
| 226 | <i>M. leidyi</i><br>Baltic Sea<br>husbandry | <i>Pseudomonas</i> sp.<br>(LC272923.1, 99%)                          | Proteobacteria | Gammaproteobacteria | Pseudomonadales   | Pseudomonadaceae  | light yellow, round          | ++  | - |
| 227 | <i>M. leidyi</i><br>Baltic Sea<br>husbandry | <i>Staphylococcus</i> sp.<br>(MG162674.1, 99%)                       | Firmicutes     | Bacilli             | Bacillales        | Staphylococcaceae | yellow-red, round            | -   | - |
| 239 | <i>M. leidyi</i><br>Baltic Sea<br>husbandry | <i>Pseudoalteromonas</i><br>sp. (JX310130.1, 99%)                    | Proteobacteria | Gammaproteobacteria | Pseudomonadales   | Pseudomonadaceae  | white-yellow, round          | +   | - |
| 244 | <i>M. leidyi</i><br>Baltic Sea<br>husbandry | <i>Thalassomonas</i> sp.<br>(KC247368.1, 97%)                        | Proteobacteria | Gammaproteobacteria | Alteromonadales   | Colwelliaceae     | translucent-yellow,<br>round | -   | - |
| 257 | <i>M. leidyi</i><br>Baltic Sea<br>husbandry | <i>Chryseobacterium</i> sp.<br>(HQ911369.1, 97%)                     | Bacteroidetes  | Flavobacteriia      | Flavobacteriales  | Flavobacteriaceae | yellow-red, round            | ++  | - |
| 267 | <i>M. leidyi</i><br>Baltic Sea<br>husbandry | <i>Alteromonas</i> sp.<br>(KX989422.1, 99%)                          | Proteobacteria | Gammaproteobacteria | Alteromonadales   | Alteromonadaceae  | white, spreading             | +   | - |
| 214 | Ambient<br>water Baltic<br>Sea              | <i>Serratia plymuthica</i><br>(KR611045.1, 99%)                      | Proteobacteria | Gammaproteobacteria | Enterobacteriales | Yersiniaceae      | red, round                   | +++ | - |
| 230 | Ambient<br>water Baltic<br>Sea              | <i>Pseudoalteromonas</i><br>sp.<br>(KM979153.1, 99%)                 | Proteobacteria | Gammaproteobacteria | Pseudomonadales   | Pseudomonadaceae  | white, round                 | +++ | - |
| 231 | Ambient<br>water Baltic<br>Sea              | <i>Pseudomonas</i> sp.<br>(JF766700.1, 99%)                          | Proteobacteria | Gammaproteobacteria | Pseudomonadales   | Pseudomonadaceae  | white, spreading             | -   | - |
| 253 | Ambient<br>water Baltic<br>Sea              | <i>Fictibacillus</i> sp.<br>(KX033807.1, 98%)                        | Firmicutes     | Bacilli             | Bacillales        | Bacillaceae       | translucent yellow,<br>round | -   | - |
| 259 | Ambient<br>water Baltic<br>Sea              | <i>Pseudoalteromonas</i><br>sp.<br>(KF188488.1, 99%)                 | Proteobacteria | Gammaproteobacteria | Pseudomonadales   | Pseudomonadaceae  | red, round                   | ++  | - |
| 266 | Ambient<br>water Baltic<br>Sea              | <i>Pseudoalteromonas</i><br>sp.<br>(FR821212.1, 97%)                 | Proteobacteria | Gammaproteobacteria | Pseudomonadales   | Pseudomonadaceae  | translucent yellow,<br>round | +   | - |
| 132 | Artificial<br>Seawater<br>18 PSU            | <i>Pseudomonas</i><br><i>anguilliseptica</i><br>(JX177685.1, 98-99%) | Proteobacteria | Gammaproteobacteria | Pseudomonadales   | Pseudomonadaceae  | light orange,<br>smeary      | -   | - |
| 133 | Artificial<br>Seawater<br>18 PSU            | <i>Pseudomonas</i> sp.<br>MBEF06<br>(AB733556.1, 97%)                | Proteobacteria | Gammaproteobacteria | Pseudomonadales   | Pseudomonadaceae  | light orange, round          | -   | - |
| 134 | Artificial<br>Seawater<br>18 PSU            | <i>Pseudomonas</i><br><i>anguilliseptica</i><br>(JX177685.1, 99%)    | Proteobacteria | Gammaproteobacteria | Pseudomonadales   | Pseudomonadaceae  | light yellow, round          | +++ | - |
| 135 | Artificial<br>Seawater<br>18 PSU            | <i>Moraxella</i> sp.<br>CHZYR52<br>(AB905490.1, 99%)                 | Proteobacteria | Gammaproteobacteria | Halobacteriales   | Moraxellaceae     | white, round                 | ++  | - |

## Supplement

|     |                            |                                                          |                |                     |                 |                   |                        |    |   |
|-----|----------------------------|----------------------------------------------------------|----------------|---------------------|-----------------|-------------------|------------------------|----|---|
| 136 | Artificial Seawater 18 PSU | <i>Pseudomonas anguilliseptica</i> (JX177685.1, 99%)     | Proteobacteria | Gammaproteobacteria | Pseudomonadales | Pseudomonadaceae  | white-yellowish, round | -  | - |
| 137 | Artificial Seawater 18 PSU | <i>Sulfitobacter</i> sp. DG885 (AY258079.1, 99%)         | Proteobacteria | Alphaproteobacteria | Rhodobacterales | Rhodobacteraceae  | white, smeary          | +  | + |
| 138 | Artificial Seawater 18 PSU | <i>Celeribacter baekdonensis</i> (NR_117908.1, 99%)      | Proteobacteria | Alphaproteobacteria | Rhodobacterales | Rhodobacteraceae  | white, smeary          | -  | - |
| 139 | Artificial Seawater 18 PSU | <i>Alteromonas</i> sp. JAM-GA15 (AB526338.1, 99%)        | Proteobacteria | Gammaproteobacteria | Alteromonadales | Alteromonadaceae  | orange, round          | ++ | - |
| 140 | Artificial Seawater 18 PSU | <i>Alteromonas</i> sp. SN2 (CP002339.1, 99%)             | Proteobacteria | Gammaproteobacteria | Alteromonadales | Alteromonadaceae  | white, smeary          | ++ | - |
| 141 | Artificial Seawater 18 PSU | <i>Pseudomonas cuatrocienegasensis</i> (JN644592.1, 98%) | Proteobacteria | Gammaproteobacteria | Pseudomonadales | Pseudomonadaceae  | yellow, round          | -  | - |
| 142 | Artificial Seawater 18 PSU | <i>Pseudomonas</i> sp. MBEF06 (AB733556.1, 99%)          | Proteobacteria | Gammaproteobacteria | Pseudomonadales | Pseudomonadaceae  | orange, smeary         | +  | - |
| 143 | Artificial Seawater 18 PSU | <i>Rhodococcus yunnanensis</i> (JN638050.1, 99%)         | Actinobacteria | Actinobacteria      | Actinomycetales | Nocardiaceae      | white, round           | -  | - |
| 145 | Artificial Seawater 18 PSU | <i>Staphylococcus warneri</i> (LC035464.1, 99%)          | Firmicutes     | Bacilli             | Bacillales      | Staphylococcaceae | white, round           | ++ | - |
| 146 | Artificial Seawater 18 PSU | <i>Staphylococcus pasteurii</i> (KP267845.1, 99%)        | Firmicutes     | Bacilli             | Bacillales      | Staphylococcaceae | white, round           | -  | - |
| 147 | Artificial Seawater 18 PSU | <i>Leisingera</i> sp. MA2-16 (KJ889016.1, 98%)           | Proteobacteria | alphaproteobacteria | rhodobacterales | rhodobacteraceae  | white, round           | -  | - |
| 148 | Artificial Seawater 18 PSU | <i>Alteromonas</i> sp. SN2 (CP002339.1, 99%)             | Proteobacteria | Gammaproteobacteria | Alteromonadales | Alteromonadaceae  | white, smeary          | +  | - |
| 149 | Artificial Seawater 18 PSU | <i>Staphylococcus saprophyticus</i> (KM095954.1, 99%)    | Firmicutes     | Bacilli             | Bacillales      | Staphylococcaceae | white, smeary          | -  | - |
| 150 | Artificial Seawater 18 PSU | <i>Staphylococcus warneri</i> (LC035464.1, 99%)          | Firmicutes     | Bacilli             | Bacillales      | Staphylococcaceae | white, round           | -  | - |
| 151 | Artificial Seawater 18 PSU | <i>Staphylococcus warneri</i> (LC035464.1, 99%)          | Firmicutes     | Bacilli             | Bacillales      | Staphylococcaceae | white line, round      | -  | - |
| 152 | Artificial Seawater 18 PSU | <i>Staphylococcus</i> sp. DVRS-2 (KF779128.1, 99%)       | Firmicutes     | Bacilli             | Bacillales      | Staphylococcaceae | white line, smeary     | -  | - |

## Supplement

|     |                            |                                                         |                |                     |                    |                   |                                        |     |   |
|-----|----------------------------|---------------------------------------------------------|----------------|---------------------|--------------------|-------------------|----------------------------------------|-----|---|
| 153 | Artificial Seawater 18 PSU | <i>Glaciecola</i> sp. DHVB6 (FJ848889.1, 99%)           | Proteobacteria | Gammaproteobacteria | Alteromonadales    | Alteromonadaceae  | white, round                           | -   | - |
| 154 | Artificial Seawater 18 PSU | <i>Alteromonas</i> sp. EM12a (HG004180.1, 99%)          | Proteobacteria | Gammaproteobacteria | Alteromonadales    | Alteromonadaceae  | white, smeary                          | ++  | - |
| 155 | Artificial Seawater 18 PSU | <i>Marinobacter</i> sp. NP-1383C-30R (KJ914666.1, 99%)  | Proteobacteria | Gammaproteobacteria | Alteromonadales    | Alteromonadaceae  | white-yellowish, round                 | +++ | - |
| 156 | Artificial Seawater 18 PSU | <i>Micrococcus</i> sp. 3723 (KP345967.1, 99%)           | Actinobacteria | Actinobacteria      | Actinomycetales    | Micrococcaceae    | yellow, round                          | -   | - |
| 157 | Artificial Seawater 18 PSU | <i>Corynebacterium</i> sp. NML96-0244 (GU238410.1, 99%) | Actinobacteria | Actinomycetales     | Corynebacteriaceae | Corynebacterium   | white, round                           | -   | - |
| 158 | Artificial Seawater 18 PSU | <i>Pseudomonas</i> sp. MT-1 (AP014655.1, 99%)           | Proteobacteria | Gammaproteobacteria | Pseudomonadales    | Pseudomonadaceae  | light yellow, smeary                   | +   | - |
| 159 | Artificial Seawater 18 PSU | <i>Pseudomonas</i> sp. MBEF06 (AB733556.1, 98-99%)      | Proteobacteria | Gammaproteobacteria | Pseudomonadales    | Pseudomonadaceae  | light yellow, smeary                   | +   | - |
| 160 | Artificial Seawater 18 PSU | <i>Staphylococcus aureus</i> (CP011528.1, 99%)          | Firmicutes     | Bacilli             | Bacillales         | Staphylococcaceae | yellow, round                          | -   | - |
| 161 | Artificial Seawater 18 PSU | <i>Pseudomonas</i> sp. MBEF06 (AB733556.1, 98-99%)      | Proteobacteria | Gammaproteobacteria | Pseudomonadales    | Pseudomonadaceae  | yellow-orange, smeary                  | -   | - |
| 162 | Artificial Seawater 18 PSU | <i>Staphylococcus aureus</i> (CP011528.1, 99%)          | Firmicutes     | Bacilli             | Bacillales         | Staphylococcaceae | orange, smeary                         | -   | - |
| 163 | Artificial Seawater 18 PSU | <i>Alteromonas</i> sp. JAM-GA15 (AB526338.1, 99%)       | Proteobacteria | Gammaproteobacteria | Alteromonadales    | Alteromonadaceae  | orange, round                          | +++ | - |
| 164 | Artificial Seawater 18 PSU | <i>Celeribacter</i> sp. CY411 (KP201135.1, 99%)         | Proteobacteria | Alphaproteobacteria | Rhodobacterales    | Rhodobacteraceae  | white, round                           | -   | - |
| 165 | Artificial Seawater 18 PSU | <i>Celeribacter baekdonensis</i> (NR_117908.1, 99%)     | Proteobacteria | Alphaproteobacteria | Rhodobacterales    | Rhodobacteraceae  | white with light yellow center, smeary | -   | - |
| 166 | Artificial Seawater 18 PSU | <i>Celeribacter baekdonensis</i> (NR_117908.1, 99%)     | Proteobacteria | Alphaproteobacteria | Rhodobacterales    | Rhodobacteraceae  | white, smeary                          | -   | - |
| 167 | Artificial Seawater 18 PSU | <i>Pseudoalteromonas</i> sp. BSi20316 (DQ492738.1, 99%) | Proteobacteria | Gammaproteobacteria | Pseudomonadales    | Pseudomonadaceae  | white-yellowish, round                 | ++  | - |
| 168 | Artificial Seawater 18 PSU | <i>Salinibacterium</i> sp. ZS4-2 (FJ196007.1, 99%)      | Actinobacteria | Actinobacteria      | Actinomycetales    | Microbacteriaceae | yellow, round                          | -   | - |

## Supplement

|     |                            |                                                                           |                |                     |                   |                   |                               |     |   |
|-----|----------------------------|---------------------------------------------------------------------------|----------------|---------------------|-------------------|-------------------|-------------------------------|-----|---|
| 169 | Artificial Seawater 18 PSU | <i>Rhodococcus fascians</i> (FJ999590.1, 99%)                             | Actinobacteria | Actinobacteria      | Actinomycetales   | Nocardiaceae      | orange, roundish              | -   | - |
| 170 | Artificial Seawater 18 PSU | <i>Pseudomonas stutzeri</i> strain QT 34 (HQ848122.1, 99%)                | Proteobacteria | Gammaproteobacteria | Pseudomonadales   | Pseudomonadaceae  | yellow, round                 | +++ | - |
| 171 | Artificial Seawater 18 PSU | <i>Pseudomonas</i> sp. MBEF06 (AB733556.1, 98-99%)                        | Proteobacteria | Gammaproteobacteria | Pseudomonadales   | Pseudomonadaceae  | yellowish, round              | ++  | - |
| 172 | Artificial Seawater 30 PSU | <i>Bacillus</i> sp. O-NR1 (JN613469.1, 99%)                               | Firmicutes     | Bacilli             | Bacillales        | Bacillaceae       | white, round                  | -   | - |
| 173 | Artificial Seawater 30 PSU | <i>Salinibacterium amurskyense</i> strain y358 (KF306352.1, 99%)          | Actinobacteria | Actinobacteria      | Actinomycetales   | Microbacteriaceae | light orange-white, round     | -   | - |
| 174 | Artificial Seawater 30 PSU | <i>Staphylococcus aureus</i> subsp. <i>aureus</i> SA268 (CP006630.1, 93%) | Firmicutes     | Bacilli             | Bacillales        | Staphylococcaceae | white, round                  | -   | - |
| 175 | Artificial Seawater 30 PSU | <i>Micrococcus</i> sp. 3723 (KP345967.1, 99%)                             | Actinobacteria | Actinobacteria      | Actinomycetales   | Micrococcaceae    | orange, roundish-smearly      | -   | - |
| 176 | Artificial Seawater 30 PSU | <i>Halomonas boliviensis</i> (JX262399.1, 99%)                            | Proteobacteria | Gammaproteobacteria | Oceanospirillales | Halomonadaceae    | light orange, round           | -   | - |
| 177 | Artificial Seawater 30 PSU | <i>Maribacter</i> sp. H24 (FJ903191.1, 98)                                | Bacteroidetes  | Flavobacteriia      | Flavobacteriales  | Flavobacteriaceae | yellowish, smearly            | +   | - |
| 178 | Artificial Seawater 30 PSU | <i>Salinibacterium amurskyense</i> (KF306352.1, 98-99%)                   | Actinobacteria | Actinobacteria      | Actinomycetales   | Microbacteriaceae | yellowish, round              | -   | - |
| 179 | Artificial Seawater 30 PSU | <i>Bacillus</i> sp. Aza15 (JQ977243.1, 99%)                               | Firmicutes     | Bacilli             | Bacillales        | Bacillaceae       | white, round                  | -   | - |
| 180 | Artificial Seawater 30 PSU | <i>Staphylococcus aureus</i> (CP011528.1, 99%)                            | Firmicutes     | Bacilli             | Bacillales        | Staphylococcaceae | white, brownish center, round | +++ | - |
| 181 | Artificial Seawater 30 PSU | <i>Chryseobacterium</i> sp. WW-RP5 (KJ958497.1, 99%)                      | Bacteroidetes  | Flavobacteriia      | Flavobacteriales  | Flavobacteriaceae | light orange, smearly         | -   | - |
| 182 | Artificial Seawater 30 PSU | <i>Microbacterium</i> sp. Cai-b5 (JX997907.1, 99%)                        | Actinobacteria | Actinobacteria      | Actinomycetales   | Microbacteriaceae | pink, round                   | -   | - |
| 184 | Artificial Seawater 30 PSU | <i>Bacillus simplex</i> (KJ161409.1, 96%)                                 | Firmicutes     | Bacilli             | Bacillales        | Bacillaceae       | white, brownish center, round | -   | - |
| 185 | Artificial Seawater        | <i>Alteromonas macleodii</i> (KP074899.1, 99%)                            | Proteobacteria | Gammaproteobacteria | Alteromonadales   | Alteromonadaceae  | orange, round                 | +++ | - |



## Supplement

|     |                            |                                                                   |                |                     |                  |                   |                                      |     |   |
|-----|----------------------------|-------------------------------------------------------------------|----------------|---------------------|------------------|-------------------|--------------------------------------|-----|---|
|     | 30 PSU                     |                                                                   |                |                     |                  |                   |                                      |     |   |
| 186 | Artificial Seawater 30 PSU | <i>Alteromonas sp.</i> SCS1700m-1 (JX533655.1, 99%)               | Proteobacteria | Gammaproteobacteria | Alteromonadales  | Alteromonadaceae  | brownish, round                      | +++ | - |
| 187 | Artificial Seawater 30 PSU | <i>Bacillus sp.</i> 7B-230 (KF441670.1, 99%)                      | Firmicutes     | Bacilli             | Bacillales       | Bacillaceae       | pink, smeary                         | -   | - |
| 188 | Artificial Seawater 30 PSU | <i>Sulfitobacter pseudonitzschiae</i> strain H3 (KF006321.2, 99%) | Proteobacteria | Alphaproteobacteria | Rhodobacterales  | Rhodobacteraceae  | white, smeary                        | +++ | - |
| 189 | Artificial Seawater 30 PSU | <i>Bacillus vietnamensis</i> (KF933713.1, 100%)                   | Firmicutes     | Bacilli             | Bacillales       | Bacillaceae       | pink, round                          | -   | - |
| 190 | Artificial Seawater 30 PSU | <i>Pseudoalteromonas sp.</i> 191Z-13 (JX310231.1, 99%)            | Proteobacteria | Gammaproteobacteria | Pseudomonadales  | Pseudomonadaceae  | light-orange, round                  | -   | - |
| 191 | Artificial Seawater 30 PSU | <i>Celeribacter sp.</i> CY411 (KP201135.1, 99%)                   | Proteobacteria | Alphaproteobacteria | Rhodobacterales  | Rhodobacteraceae  | white, round                         | -   | - |
| 192 | Artificial Seawater 30 PSU | <i>Microbacterium sp.</i> JL1103 (DQ985063.1, 99%)                | Actinobacteria | Actinobacteria      | Actinomycetales  | Microbacteriaceae | light orange, smeary                 | -   | - |
| 193 | Artificial Seawater 30 PSU | <i>Brevibacterium frigoritolerans</i> (KJ767331.1, 99%)           | Actinobacteria | Actinobacteria      | Actinomycetales  | Brevibacteriaceae | white, roundish                      | ++  | - |
| 194 | Artificial Seawater 30 PSU | <i>Cobetia amphilecti</i> (KP204120.1, 85%)                       | Proteobacteria | Gammaproteobacteria | Halomonadaceae   | Cobetia           | pink, round                          | +   | - |
| 195 | Artificial Seawater 30 PSU | <i>Bacillus sp.</i> T1T (AM983464.1, 99%)                         | Firmicutes     | Bacilli             | Bacillales       | Bacillaceae       | translucent, round                   | -   | - |
| 196 | Artificial Seawater 30 PSU | <i>Pseudomonas syringae pv. pisi</i> (KP211411.1, 99%)            | Proteobacteria | Gammaproteobacteria | Pseudomonadales  | Pseudomonadaceae  | yellow, round                        | +++ | + |
| 197 | Artificial Seawater 30 PSU | <i>Pseudomonas pachastrellae</i> (KM460937.1, 99%)                | Proteobacteria | Gammaproteobacteria | Pseudomonadales  | Pseudomonadaceae  | white, round                         | -   | - |
| 199 | Artificial Seawater 30 PSU | <i>Maribacter sp.</i> H24 (FJ903191.1, 93)                        | Bacteroidetes  | Flavobacteriia      | Flavobacteriales | Flavobacteriaceae | white, round, smeary in high density | -   | - |
| 200 | Artificial Seawater 30 PSU | <i>Pseudoalteromonas sp.</i> AB293f (FR821202.1, 99%)             | Proteobacteria | Gammaproteobacteria | Pseudomonadales  | Pseudomonadaceae  | grey-white, round                    | ++  | - |
| 201 | Artificial Seawater 30 PSU | <i>Cobetia amphilecti</i> (NR_113404.1, 99%)                      | Proteobacteria | Gammaproteobacteria | Halomonadaceae   | Cobetia           | white, round                         | ++  | - |

## Supplement

|     |                            |                                                          |                |                     |                  |                   |                                      |     |   |
|-----|----------------------------|----------------------------------------------------------|----------------|---------------------|------------------|-------------------|--------------------------------------|-----|---|
| 202 | Artificial Seawater 30 PSU | <i>Maribacter</i> sp. H24 (FJ903191.1, 99%)              | Bacteroidetes  | Flavobacteriia      | Flavobacteriales | Flavobacteriaceae | white, round, small                  | -   | - |
| 203 | Artificial Seawater 30 PSU | <i>Pseudoalteromonas espejiana</i> (KP204135.1, 99%)     | Proteobacteria | Gammaproteobacteria | Pseudomonadales  | Pseudomonadaceae  | white, round, smeary in high density | +++ | - |
| 204 | Artificial Seawater 30 PSU | <i>Sulfitobacter</i> sp. QD214-NF102 (KC689801.1, 99%)   | Proteobacteria | Alphaproteobacteria | Rhodobacterales  | Rhodobacteraceae  | white, round, smeary in high density | -   | - |
| 205 | Artificial Seawater 30 PSU | <i>Pseudomonas</i> sp. MBTN3D1-a3 (JN975148.1, 89%)      | Proteobacteria | Gammaproteobacteria | Pseudomonadales  | Pseudomonadaceae  | white, round                         | -   | - |
| 206 | Artificial Seawater 30 PSU | <i>Bacillus mycoides</i> (CP009692.1, 99%)               | Firmicutes     | Bacilli             | Bacillales       | Bacillaceae       | white-orange/brownish, smeary        | -   | - |
| 207 | Artificial Seawater 30 PSU | <i>Bacillus hwajinpoensis</i> (KJ009474.1, 99%)          | Firmicutes     | Bacilli             | Bacillales       | Bacillaceae       | white-orange, smeary                 | -   | - |
| 208 | Artificial Seawater 30 PSU | <i>Pseudoalteromonas issachenkonii</i> (JQ799065.1, 99%) | Proteobacteria | Gammaproteobacteria | Pseudomonadales  | Pseudomonadaceae  | white-yellowish, smeary              | +   | - |
| 209 | Artificial Seawater 30 PSU | <i>Brevibacterium frigoritolerans</i> (KF475857.1, 99%)  | Actinobacteria | Actinobacteria      | Actinomycetales  | Brevibacteriaceae | white, roundish                      | -   | - |
| 210 | Artificial Seawater 30 PSU | <i>Bacillus simplex</i> (KM817245.1, 99%)                | Firmicutes     | Bacilli             | Bacillales       | Bacillaceae       | white, smeary                        | ++  | - |
| 212 | Artificial Seawater 30 PSU | <i>Fictibacillus phosphorivorans</i> (NR_118455.1, 99%)  | Firmicutes     | Bacilli             | Bacillales       | Bacillaceae       | translucent, smeary                  | -   | - |

## Supplement

**Sequence data of identified putative QQ-ORFs of fosmid clone 5/E6 originating from the genomic library of isolate 91 (*Pseudoalteromonas issachenkonii*)**

## I. 91\_5/E6\_ORF1

| Best homologue<br>(based on aa sequence) | Protein   | Accession No.  | Identity |
|------------------------------------------|-----------|----------------|----------|
| <i>Pseudoalteromonas</i> sp.<br>TB41     | Integrase | WP_024602773.1 | 98 %     |

## &gt;ORF1\_nucleotide sequence

ATGAACTTTACAGACAAATCAATTAAGGCACTTAAGGCCAAAGAAAAACGTTACGTATTAACCGAGTCAGGTAACAT  
 GGGGAAGGGCGTTTACAAATAAGGGTGAGTGAATCAGGCGCTAAAACGTTTCGGGTTTCAGTATCACATAAACGGTAAG  
 CGCAAAGTAATTGGTCTTGGTAATTATCCTACCGTTGATCTTAAAAAAGCACGTAGTAAACATGCAAAAATAGCAGTC  
 TTATTAAGTGACAATATCGACCCGCAAGAGCATCAATTAGAAGCCCAAAAAATAGAGTTCGAATCATCAGCAAAGCGT  
 ACCATGTTACAAATGCTCGCTGACTTTAATGTATTTCATAAGTACACGCTGGGCAGAGTCAACAATAGACCGAACTGAA  
 AACTCATTTAAAAGAAACATCACCCCGTTTATAAAACCCGAATTAATGCCCGACGAGTTCACCATAGATATGGCCCGC  
 GACATTATTTACCGTGTTTATAATCGTGGCGCAAAGAACAAGCGCGACTAGTTCGCAGCATACTAATGAGCATATTA  
 AAATTTGCTATAGATTTTGATAACTCACCAGAGCAATACAAAAAGCCAAACCTATACGACATAAAAAACAAATTCATC  
 AGAGACATTAACTTTGAACGCCAAAAAACAAAGGTGAACGCTGGTTAAGCGAGGCTGAACTAAAAAAGTATGGAAT  
 GCAGACGACCTACCTTATTACCCACCAATACATAAAACTGGCATTATTACTTGGTGGTCAGCGAGTAAATGAGGTT  
 TACGGCTCATAAGTGAAGTACTTTGATTTAGAAAATAAAACTTTTCACTATCCCGCAAATCGTATCAAAGTACAACAA  
 CGGGGCGATCACATAGTGCCATTATGCGAAACCGCAATACCAATCATCCAAGAGCTAATTCACAACAGCAGGTAAGCT  
 GGTCAAATGTTCCCGCATCGCGACAACCCAACAGCCACCGCCCATGTATCAACACTTCGAATGGCAATATTACGATGG  
 TCGCAAAAAAACAAAGTGCCAAACTTTAATCCCGTGATCTACGCAGAACGTGTA AACACTCATGGGCAAAGCAGGC  
 ATAGATAAAATAAACCGCGACATACTGCAGCAACACAACAAGTTTGATGTATCAAGTGTGCATTACGACAGATACGAC  
 TATATGAAAGAAAAACGCCAAAGCATTGAGGTGTGGGAAACTGCTTATGAATTGTGCCATAAAGTAAGCTTAGTATTG  
 TAA

## &gt;ORF1\_amino acid sequence

MNFTDKSIKALKAKEKRYVLTESGNYGEGRLQIRVSESGAKTFRVQYHINGKRKVI GLGNYPVLDLKKARS  
 KHAKIAVLLSDNIDPQEHQLEAQKIEFESSAKRTMLQMLADFNVFISTRWAESTIDRTEKLIKRNITPFIK  
 PELMPDEFITDMARDI IYRVYNRGAKEQARLVRSILMSILKFAIDFNSPEQYKKPNLYDIKTNFIRDINF  
 ETPKNKGERWLSEAE LKVVNADDLPYYTHQYIKLALLLGGQRVNEVYGSYVSDFDLENKTFTI PANRIKV  
 QQRGDHIVPLCETAIP I IQELIQQAGKAGQMFPHRDNPTATAHVSTLRMAILRWCEKNKVPNFNPRDLRRT  
 CKTLMGKAGIDKINRDILQQHNKFDVSSVHYDRYDYMKEKRQSI EVWETAYELCHKVSLVL

## II. 91\_5/E6\_ORF2

| Best homologue<br>(based on aa sequence) | Protein   | Accession No.  | Identity |
|------------------------------------------|-----------|----------------|----------|
| <i>Pseudoalteromonas</i>                 | Cation/H+ | WP_096038305.1 | 98 %     |

## Supplement

|                  |            |  |  |
|------------------|------------|--|--|
| <i>teradonis</i> | antiporter |  |  |
|------------------|------------|--|--|

>ORF2\_nucleotide sequence

ATGCGTGGTACCGACACTTGGTTTTTATTAGTCGGTTTTGACGGGTTAACTACACTTTTTATTTGGCGCTTACATCGCG  
 CTATTCAAACATGATTTAAAAGGCTTATTAGCCTATTCAACAATTAGTCATTTAGGCCTAATTACTCTATTACTCGGC  
 CTAGACACACAACCTTGCAACCGTAGCCGCTATTTTTTCATATTATTAACCATGCTACGTTTAAAGCGTCGTTATTTATG  
 GCCACGGGTATTATTGACCATGAAACCGGCACGCGTGATATGCGCAAACCTCAATGGCATGTGGCGCTACTTACCTTAT  
 ACGGCCACATTAGCGATGGTGGCCGCTGCCGCTATGGCGGGTGTACCGCTATTAATGGTTTTCTTATCTAAAGAAATG  
 TTTTTTGCTGAAACACTGCATCAGCAAGTACTTGGCTCTATGTGCTGGTTAATTCCTGTGCTGGCAACCGTTGCAGGT  
 GCGCTGTGCGTAGCGTACTCATCTCGCTTTATTCATGACGTGTTCTTTAATGGTGAACCGATAGACTTACCACGCACC  
 CCTCATGAGGCGCCACGTTATATGCGTGTGCCATCGAAATTTAGTGGTGTATGTATTTTAGTGGGTATTTTTCCG  
 CACTTTCAGTAGATGGTATTTTATCGGCTGCCTCATTTGGCCGACTTGGCCAAGCTATGCCTGAGTACAAGCTAACT  
 ATTTGGCACGGTTTCAATTTACCTCTACTTATGAGTGGTATGGCGGTGATTGGTGGTTTTATTTATTTACGTTAATCGT  
 AAGTACTTGTTCAGTTTCAGGCGTCTTACCTCCTTTAACGCTAAAAAATCTTCGAGCGTTTTTTAGCGGTTGTG  
 GTTAATTGGTGTCAAACAAAATCCAATCAAACAGAAAATGGCTCATTACAACGCTATGTATTTATTTATGTTAGGTGT  
 TGTATTGCTTGCCTCAGGTTGGCCATTATTTGA

>ORF2\_amino acid sequence

MRGTDTWFLLVGLTGLTLLFGAYIALFKHDLKGLLAYSTISHLGLITLLLGLDTQLATVAAIFHIINHATFKASLFM  
 ATGIIDHETGTRDMRKLNGMWRYPYATLAMVAAAAMAGVPLLNGFLSKEMFFAETLHQQVLGSMWLIPVLTAVAG  
 ALSVAYSSRFIHDVFFNGEPIIDLPRTPHEAPRYMRVPIEILVVLCLVGFPHFAVDGILSAASLAVLGQAMPEYKLT  
 IWHGFNLPLLMGMAVIGGLFIYVNRKYLQFQASLPPFNAKKIFERFLAVVVNWCQNKIQSNRKWLITTLCIYYVRC  
 CIACLRLLAI

### III. 91\_5/E6\_ORF3

| Best homologue<br>(based on aa sequence)  | Protein                 | Accession No. | Identity |
|-------------------------------------------|-------------------------|---------------|----------|
| <i>Pseudoalteromonas sp.</i><br>DSM 26666 | Cation/H+<br>antiporter | WP_09049398.1 | 100 %    |

>ORF2\_nucleotide sequence

ATGCACGGCGGCGGTAAACCAAAAACACGTGCAGCACTGCATTACGTTATTTTAACTTGGTTGGCTCAAGTGTATTT  
 TTAATCGGCTTAGGTATTTTATATGGGGTATTGGGTACCCTAAACATTTGCTGATATGGCTAATAAAGTACCGCAGTTA  
 ACTGGTGTATGATGTTTATTTAGCTAAAGCGGGCGGGTACTATTGCTTGTAGTATTTGCCCTTAAAAGTGCACATTA  
 CCACTGCATTTATGGCTCCCAAATGCCTATTCAAGTGCACACCTGTGGTTGCTGCATTATTCGCGATTATGACAAA  
 GTAGGTGTTTACGCCACTTTACGCGTATATACAGTGGTATTTGGTGAGCAAGCCGGTGAACCTGAGCATATGGCGCAG  
 TCTTGGCTATGGGCGTTGGCCATTGCTACTATAGTGATTGGGGCAATCGGGGTGTTGGCAGCACAAAGATTTACGTAAG  
 CTTACCGCAAACCTTAGTACTGGTTTTCTGTGGGTACTTTAGTGGCACTGGTTGCACCTCAAATATAAACGCCACAGCT  
 GCACTATTGTATTATTTGGTGCACCTCAACGTTAGTGACTGCAGCACTATTTTTACTGGCTGATTTAATTGCAACTCAG  
 CGAGGTAAAGCCGGCGACAGATTAGTTGGCGGACGCGCAGTTAAACAACCATTTCTTGTGGGAGCGTGTTTTTATTATC  
 GCTGGACTAACCGTCATAGGTATGCCGCCACTTTCAGGTTTTGTAGGTAAAATTTGGATTTTAAAACCACCTTAAAC  
 AGTGAGCAAGCACTGGTATTTTGGCCTGTTTACTTAATTATGAGCTTAGCGTTAATTGTTGCTATATCACGTGCAGGC  
 ACGAGTTTGTTTTGGGAGCATAAAGACAAAGCCGGTGGGCTGGTGTATGTTGCTAATGCACATCCGTTGCAAGTTATC

## Supplement

GTACTTGTGGCCTGCTCACAAGCTCAATACTGTTGGTTGTTTTTGGTGATTTGGCAACGCAATATGCACTTGAAACA  
GCAACACAACCTTCATGATATTAGTGGTGGTATTAATGCGGTACTCAAGGGAGGTCTGTAA

>ORF3\_amino acid sequence

MHGGGKPKTRAALHYVILNLVGSSVFLIGLGILYGVLGTLNIADMANKVPQLTGDDVYLAKAGLLLLLVFALKSALL  
PLHLWLPNAYSSATPVVAALFAIMTKVGVYATLRVYTVVFGEQAGELEHMAQSWLWALAIATIVIGAIGVLAQDLRK  
LTANLVLVSVGTLVALVALQNINATAALLYLVHSTLVTAALFLLADLIATQRGKAGDRLVGGRAVKQPFLGACFII  
AGLTVIGMPPLSGFVGKIWILK'TTLNSEQALVFWPVYLIMSLALIVAI SRAGTSLFWEHKDKGGEAGDVANAHPLQVI  
VLVGLLTSSILLVVFGLATQYALETATQLHDISGGINAVLKGL
